# Calpain Inhibition Reduces Amplitude and Accelerates Decay of the Late Sodium Current in Ventricular Myocytes from Dogs with Chronic Heart Failure

Albertas Undrovinas<sup>1\*</sup>, Victor A. Maltsev<sup>2</sup>, Hani N. Sabbah<sup>1</sup>

<sup>1</sup> Department of Internal Medicine, Henry Ford Hospital, Detroit, Michigan, United States of America, <sup>2</sup> National Institute on Aging, Intramural Research Program, Baltimore, Maryland, United States of America

## Abstract

Calpain is an intracellular  $\text{Ca}^{2+}$ -activated protease that is involved in numerous  $\text{Ca}^{2+}$ -dependent regulation of protein function in many cell types. This paper tests a hypothesis that calpains are involved in  $\text{Ca}^{2+}$ -dependent increase of the late sodium current ( $I_{\text{NaL}}$ ) in failing heart. Chronic heart failure (HF) was induced in 2 dogs by multiple coronary artery embolization. Using a conventional patch-clamp technique, the whole-cell  $I_{\text{NaL}}$  was recorded in enzymatically isolated ventricular cardiomyocytes (VCMs) in which  $I_{\text{NaL}}$  was activated by the presence of a higher ( $1\mu\text{M}$ ) intracellular  $[\text{Ca}^{2+}]$  in the patch pipette. Cell suspensions were exposed to a cell-permeant calpain inhibitor MDL-28170 for 1–2 h before  $I_{\text{NaL}}$  recordings. The numerical excitation-contraction coupling (ECC) model was used to evaluate electrophysiological effects of calpain inhibition *in silico*. MDL caused acceleration of  $I_{\text{NaL}}$  decay evaluated by the two-exponential fit ( $\tau_1 = 42 \pm 3.0$  ms  $\tau_2 = 435 \pm 27$  ms,  $n = 6$ , in MDL vs.  $\tau_1 = 52 \pm 2.1$  ms  $\tau_2 = 605 \pm 26$  control no vehicle,  $n = 11$ , and vs.  $\tau_1 = 52 \pm 2.8$  ms  $\tau_2 = 583 \pm 37$  ms  $n = 7$ , control with vehicle,  $P < 0.05$  ANOVA). MDL significantly reduced  $I_{\text{NaL}}$  density recorded at  $-30$  mV ( $0.488 \pm 0.03$ ,  $n = 12$ , in control no vehicle,  $0.4502 \pm 0.0210$ ,  $n = 9$  in vehicle vs.  $0.166 \pm 0.05$  pA/pF,  $n = 5$ , in MDL). Our measurements of current-voltage relationships demonstrated that the  $I_{\text{NaL}}$  density was decreased by MDL in a wide range of potentials, including that for the action potential plateau. At the same time the membrane potential dependency of the steady-state activation and inactivation remained unchanged in the MDL-treated VCMs. Our ECC model predicted that calpain inhibition greatly improves myocyte function by reducing the action potential duration and intracellular diastolic  $\text{Ca}^{2+}$  accumulation in the pulse train.

**Conclusions:** Calpain inhibition reverses  $I_{\text{NaL}}$  changes in failing dog ventricular cardiomyocytes in the presence of high intracellular  $\text{Ca}^{2+}$ . Specifically it decreases  $I_{\text{NaL}}$  density and accelerates  $I_{\text{NaL}}$  kinetics resulting in improvement of myocyte electrical response and  $\text{Ca}^{2+}$  handling as predicted by our *in silico* simulations.

**Citation:** Undrovinas A, Maltsev VA, Sabbah HN (2013) Calpain Inhibition Reduces Amplitude and Accelerates Decay of the Late Sodium Current in Ventricular Myocytes from Dogs with Chronic Heart Failure. PLoS ONE 8(4): e54436. doi:10.1371/journal.pone.0054436

**Editor:** Vladimir E. Bondarenko, Georgia State University, United States of America

**Received:** September 10, 2012; **Accepted:** December 12, 2012; **Published:** April 15, 2013

**Copyright:** © 2013 Undrovinas et al. This is an open-access article distributed under the terms of the Creative Commons Attribution License, which permits unrestricted use, distribution, and reproduction in any medium, provided the original author and source are credited.

**Funding:** This study was supported by National Heart, Lung, and Blood Institute Grants HL-53819 and HL-074238, by a grant-in-aid from the American Heart Association (0350472Z; to AU), and, in part, by the Intramural Research Program of the National Institute on Aging (to VM; the numerical modeling part). The funders had no role in study design, data collection and analysis, decision to publish, or preparation of the manuscript.

**Competing Interests:** The authors have declared that no competing interests exist.

\* E-mail: adas7247@yahoo.com

## Introduction

The role of the late sodium current ( $I_{\text{NaL}}$ ) in electrophysiological remodeling and arrhythmias in chronic heart failure (HF) has been extensively studied during the last decade. It has been shown that  $I_{\text{NaL}}$  is augmented and its decay slowed in failing human and dog ventricular cardiomyocytes (VCMs) (see for review [1]). A remarkable contribution of  $I_{\text{NaL}}$  into HF mechanisms has been demonstrated in experiments where “correction” of  $I_{\text{NaL}}$  in failing VCMs resulted in: 1) rescue of normal repolarization, 2) decrease beat-to-beat action potential (AP) duration variability, and 3) improvement of  $\text{Ca}^{2+}$  handling and contractility [1]. Accordingly,  $I_{\text{NaL}}$  has emerged as a novel target for cardioprotection to treat the failing heart [1,2]. The new approaches may involve: 1) discovery new drugs that directly and specifically target  $I_{\text{NaL}}$ , 2) targeting intracellular signaling pathways (for example  $\text{Ca}^{2+}$ -dependent signaling) that are altered in HF and may have modulatory effect

on  $I_{\text{NaL}}$ , 3) modulation of altered  $\text{Na}^+$  channel (NaCh) microenvironment, such as different expression of auxiliary  $\beta$ -subunits and sub-sarcolemmal cytoskeleton that, in turn, may be responsible for the augmented slowed  $I_{\text{NaL}}$  in HF, 4) combination of two latter mechanisms. The new drug, ranolazine (RAN) that was developed as an antianginal agent, has been demonstrated to specifically inhibit  $I_{\text{NaL}}$  [3,4]. RAN reduced arrhythmias in the immediately post-MI patients in the recent MERILIN-TIMI trial [5] confirming the clinical relevance of  $I_{\text{NaL}}$ .  $\text{Ca}^{2+}$ , calmodulin and CaMKII and this  $\text{Ca}^{2+}$  signaling pathway can significantly amplify  $I_{\text{NaL}}$  in HF affecting both contractile and electrical performance [6,7]. As to NaCh microenvironment, it has been shown that alterations in membrane phospholipids composition and/or in sub-sarcolemmal cytoskeleton, which consists of ankyrin, actin, spectrin (fodrin), can affect NaCh gating in heart in the way that the late openings may occur [1,8,9]. Recently we have shown that silencing SCN1B but not SCN2B, the genes that are responsible for expression of the  $\beta_1$

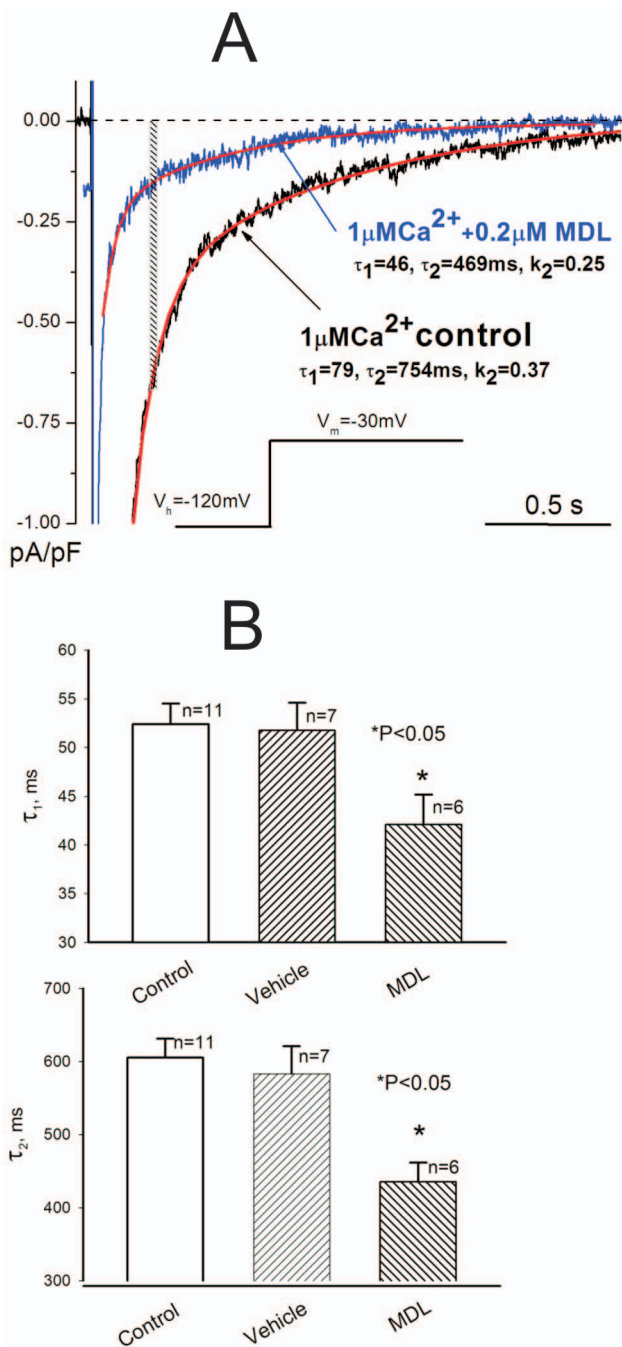

**Figure 1. Calpain inhibitor MDL modulates  $I_{NaL}$  kinetics and amplitude in ventricular cardiomyocytes of ventricular myocytes of failing dog hearts.** A. Representative raw traces were recorded at  $[Ca^{2+}]_i = 1 \mu M$  in failing cardiac myocytes before (control) and after exposure to  $0.2 \mu M$  of MDL. Exponential fits (Eq.1, see Methods) are shown by solid lines, together with their parameters. Inset shows voltage-clamp protocol. Vertical bar indicate the time window (200–220 ms of depolarization) used to evaluate  $I_{NaL}$  density. B. Statistical data for the decay time constants  $\tau_1$  and  $\tau_2$ . Bars represent average data mean  $\pm$  SEM, n – number of cells. Statistical significant difference  $*P < 0.05$  were evaluated by the Student’s t-test. doi:10.1371/journal.pone.0054436.g001

and  $\beta_2$  NaCh subunits, could be a plausible mechanism to modulate  $I_{NaL}$  in HF with the aim to improve both contractility and rhythm [10].

Calpain is an intracellular  $Ca^{2+}$ -activated protease and an important mediator of the actions of the intracellular  $Ca^{2+}$  in heart. Cleavage by calpain is critical in a variety of calcium-regulated cellular processes such as muscle contraction, neuronal excitability, secretion, signal transduction, cell proliferation, differentiation, cell cycle progression, and apoptosis [11,12]. Deregulation of calpain caused by impaired  $Ca^{2+}$  homeostasis during cardiac pathologies such as atrial fibrillation, heart failure, hypertrophy, or ischemia reperfusion, is critically involved in the myocardial damage. One of the intracellular targets of calpain is fodrin, a dynamic structure that is altered under a variety of pathological conditions featuring poor  $Ca^{2+}$  handling (e.g. ischemia or heart failure [13,14,15,16]). In the present study we tested the hypothesis that the membrane-permeant calpain inhibitor MDL-28170 (MDL) can prevent, in part,  $Ca^{2+}$ -related  $I_{NaL}$  modulation in VCMs from dogs with chronic HF. We found that MDL reduces density of whole-cell  $I_{NaL}$  and makes  $I_{NaL}$  decay faster in the failing VCMs. Using the excitation – contraction coupling (ECC) numerical model [17] we also assessed physiological significance of the MDL effects. We show that these MDL-induced  $I_{NaL}$  alterations: 1) reduce AP duration, and 2) prevent diastolic intracellular  $Ca^{2+}$  accumulation during the excitation pulse train in silico.

## Materials and Methods

### 2.1. HF model and cardiomyocyte isolation

The study conforms to the Guidelines for Care and Use of Laboratory Animals published by the US National Institutes of Health and was approved by the Animal Care and Use Committee (IACUC protocols 0816 and 0777) of the Henry Ford Health System. Chronic heart failure that is similar by vast array of functional and pathophysiological parameters [18] to that in

**Table 1.** Experimentally measured (Italic font) and derived (calculated) parameters of  $I_{NaL}$  that was used in our numerical model simulations (at  $37^\circ C$ ) of simultaneous dynamics of membrane potential and intracellular  $[Ca^{2+}]_i$ .

| Parameter       | Units          | 24 °C   |          | 37 °C   |          |
|-----------------|----------------|---------|----------|---------|----------|
|                 |                | Control | MDL      | Control | MDL      |
| $I_{NaL,200ms}$ | pA/pF          | 0.488   | 0.1661   | ND      | ND       |
| $\tau_{BM}$     | Ms             | 52.39   | 42.1     | 18.7974 | 15.1054  |
| $\tau_{LSM}$    | Ms             | 605.2   | 435.2    | 217.145 | 156.149  |
| $k_{LSM}$       | dimension less | 0.4088  | 0.49     | ND      | ND       |
| $k_{BM}$        | dimension less | 0.5912  | 0.51     | ND      | ND       |
| $I_{max}$       | pA/pF          | 2.43534 | 0.879164 | 4.12552 | 1.48932  |
| $I_{max,BM}$    | pA/pF          | 1.81165 | 0.624718 | 3.06897 | 1.05828  |
| $I_{max,LSM}$   | pA/pF          | 0.62369 | 0.254446 | 1.05655 | 0.431036 |
| $G_{NaL,max}$   | mS/ $\mu$ F    | ND      | ND       | 0.03997 | 0.01505  |
| $k_A$           | mV             | 5.2     | 5        | 5.2     | 5        |
| $V_{1/2A}$      | mV             | -74.86  | -79.74   | -74.86  | -79.74   |
| $k_G$           | mV             | 6.4     | 6.9      | 6.4     | 6.9      |
| $V_{1/2G}$      | mV             | -42     | -41      | -42     | -41      |

ND: not defined. Parameter definitions were originally given in [17] and we also describe them in Section 3.4. ECC model predictions of physiological importance. doi:10.1371/journal.pone.0054436.t001

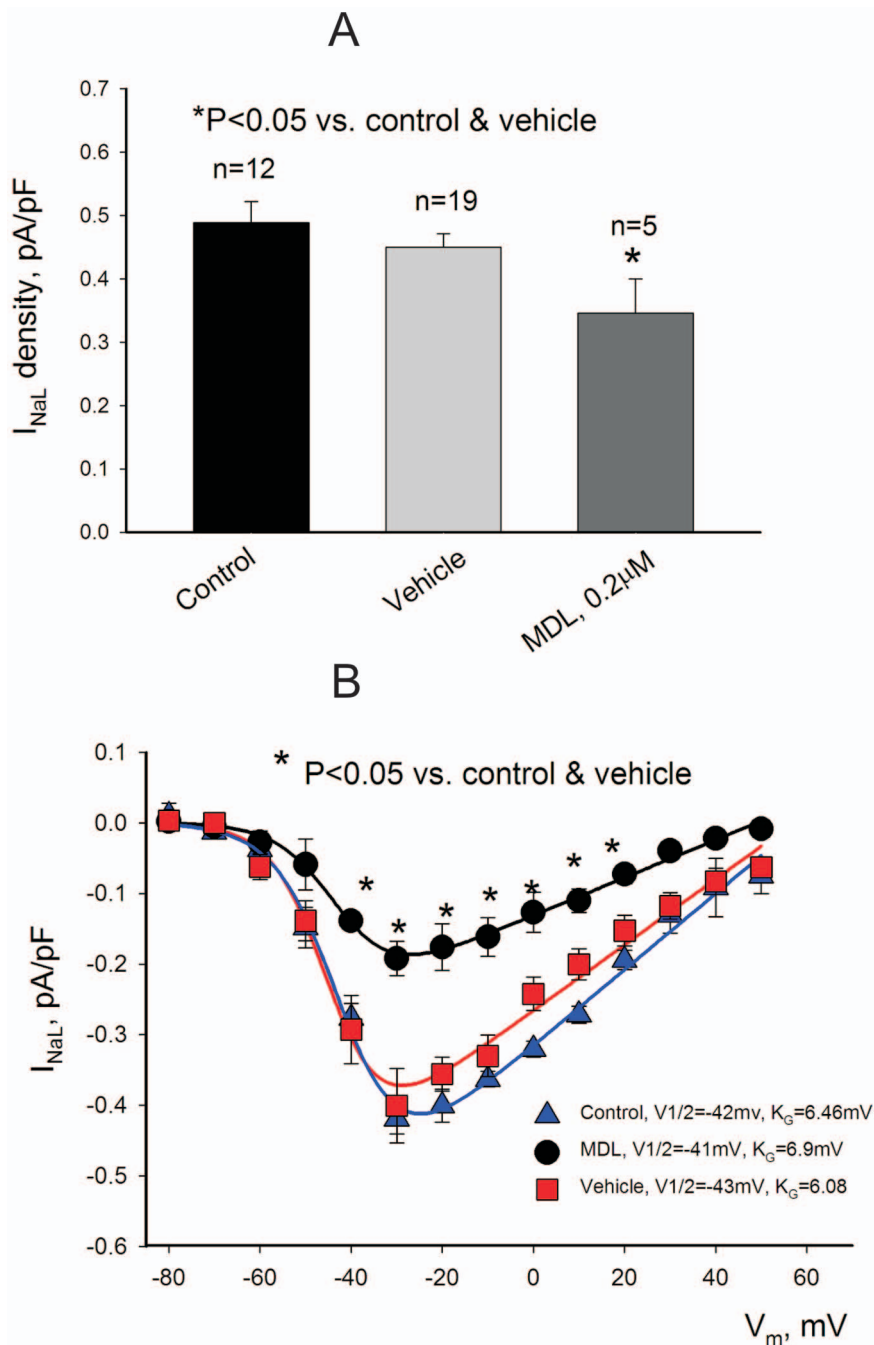

**Figure 2. Calpain inhibitor MDL reduces  $I_{NaL}$  density without changes in the steady-state activation parameters in cardiomyocytes from dogs with heart failure.** A. Statistical data for the  $I_{NaL}$  density in control (no vehicle), with the vehicle (DMSO), and in the presence of MDL (0.2  $\mu$ M). The  $I_{NaL}$  density was measured at 200–220 ms after depolarization to  $-30$  mV from the holding potential of  $-120$  mV. B. Data points represent current-voltage relationship in control (blue triangles, red squares), and in the presence of MDL (black circles). The solid lines show theoretical curves of the steady-state activation (SSA, Eq.2, Methods) fitted to data point. MDL caused significant reduction of the maximum  $I_{NaL}$  conductance  $G_{max}$  from 5.5 (control) and 0.47(vehicle) to 0.27 pS/pF (MDL) ( $P<0.001$ , F-test). Other fit parameters (mid-point potential,  $V_{1/2}$ , and the slope coefficient,  $k_G$ , remained almost unchanged in augmented in these conditions (values are shown at the traces). In all these experiments depicted in the figure the intracellular  $[Ca^{2+}]_i = 1 \mu$ M. doi:10.1371/journal.pone.0054436.g002

humans was produced in 2 dogs by multiple sequential coronary artery microsphere embolizations as previously described [19]. At the time of harvesting the heart ( $\sim 3$  months after last embolization), left ventricular (LV) ejection fraction was approximately

$\sim 25\%$ . Ventricular cardiomyocytes (VCMs) were enzymatically isolated from the apical LV mid-myocardial slices as previously reported [20]. The yield of viable rod-shaped,  $Ca^{2+}$ -tolerant VCMs varied from 40 to 70%.

## 2.2. Patch clamp technique and data analysis

$I_{NaL}$  was measured using a whole-cell patch-clamp technique [20].  $I_{NaL}$  was assessed by 2 s-long membrane depolarizations to various potentials from a holding potential of  $-130$  mV applied with a stimulation frequency of 0.2 Hz. The bath solution contained (in mM): 140 NaCl, 5.0 CsCl, 1.8 CaCl<sub>2</sub>, 2.0 MgCl<sub>2</sub>, 5 glucose, 0.002 nifedipine, and 5 HEPES-CsOH buffer (pH 7.4). The pipette solution contained (in mM): 5 NaCl, 133 CsCl, 0.9 CaCl<sub>2</sub> (free  $[Ca^{2+}] = 1 \mu M$ ) MgATP, 20 Tetraethylammonium chloride, 1.0 EGTA, and 5.0 HEPES-CsOH buffer. The free  $[Ca^{2+}]$  of  $1 \mu M$  was set in the pipette (and hence inside the cell) to exaggerate abnormal effect of  $Ca^{2+}$  on  $I_{NaL}$  in HF [21]. Experiments were performed at room temperature ( $22$ – $24^\circ C$ ). A stock solution of the cell-permeant MDL 28170 (MDL) was prepared in DMSO. MDL was then diluted in the bath solution to a final concentration of  $0.2 \mu M$  and  $2.6$  mM DMSO [21,22]. Cells suspensions were exposed to MDL from 1–2 hours prior to patch-clamp experiments, and MDL was also added to the pipette solution [23,24]. All measurements were made in the presence of MDL in the bath solution and 8–25 min after the membrane rupture to complete cell dialysis with intracellular recording solutions [25,26].

The time course of  $I_{NaL}$  decay has been approximated by a double exponential fit to  $I_{NaL}$  starting at 40 ms after the onset of depolarization to  $-30$  mV as previously suggested [27]:

$$f(t) = I_{40} \{k_1 \cdot \exp(-t/\tau_1) + k_2(-t/\tau_2)\} \quad (1)$$

where  $\tau_1$  and  $\tau_2$  are the time constants,  $I_{40}$  is  $I_{NaL}$  instant value 40 ms after membrane depolarization,  $k_1$  and  $k_2$  are the contributions of each exponents ( $k_1 + k_2 = 1$ ), respectively. 5–15 experimental traces were averaged to improve the quality of analysis.

Original  $I_{NaL}$  recordings were also analyzed to assess the current density (pA/pF), i.e.  $I_{NaL} = (\text{whole cell } I_{NaL})/C_m$ , where  $C_m$  is cell electric capacitance that was measured by a voltage ramp (16) in each cell. The  $I_{NaL}$  data points in the current-voltage relationships were measured as the averaged current density within 200–220 ms after depolarization onset (vertical bar in Fig. 1A). The steady-state activation (SSA) parameters were determined from the current-voltage relationships by fitting data points of the normalized current with the function [27]:

$$I_{Na}(V_t) = G_{max} \cdot (V_r - V_t) / \{1 + \exp[(V_{1/2G} - V_t)/K_G]\} \quad (2)$$

Where  $G_{max}$  is a normalized maximum  $Na^+$  conductance,  $V_r$  is a reversal potential;  $V_{1/2G}$ , and  $K_G$  are the midpoint and the slope of the respective Boltzmann function underlying the steady-state  $Na^+$  channel activation.

The steady-state inactivation (SSI) was evaluated by a double-pulse protocol with 2 s-duration pre-pulses ( $V_p$ ) ranging from  $-130$  mV to  $-40$  mV followed by a testing pulse to  $-30$  mV.  $I_{Na}$  amplitudes were normalized to that measured at  $V_p = -130$  mV and the data points were fitted to a Boltzmann function  $A(V_p)$ :

$$A(V_p) = 1 / (1 + \exp((V_{1/2A} - V_p)/K_A)) \quad (3)$$

## 2.3. Numerical model simulation of calpain inhibition of effect in failing myocytes

We simulated effect of selective inhibition of calpain on AP shape and diastolic  $Ca^{2+}$  accumulation *in silico* using our previously

reported modification of EC coupling model of failing canine ventricular myocyte (originally developed by Winslow et al. [28]). In short, our model has introduced a new detailed formulation of  $I_{NaL}$  lacking in the original model. This important model modification has allowed us to predict an important role of  $I_{NaL}$  to alter AP shape (increase AP plateau duration) and to contribute to diastolic  $Ca^{2+}$  accumulation in HF ventricular myocytes [17]. In short, in our *in silico* examinations we use  $I_{NaL}$  data measured under voltage clamp at  $24^\circ C$  and then apply  $Q_{10}$  factors to calculate model parameters for our full  $I_{NaL}$  description at  $37^\circ C$ . The details of the model parameters calculations have been described in our previous publications [17]. Specific parameter values of the present study are given in Table 1. The stair case phenomenon was simulated by assigning a relatively low  $[Ca^{2+}]$  of  $0.125 \mu M$  as an initial value in both network SR and junctional SR before application of stimulation pulse train (at 1 Hz or 1.5 Hz).

## 2.4. Statistical Analysis

Multiple comparisons between treatment groups were made using one-way analysis of variance (ANOVA) followed by Bonferroni's post hoc test or by the non-paired Student's t-test if appropriate. Data are reported as mean  $\pm$  SEM. The significance of SSA or SSI changes were evaluated using F-test (StatMost, DataMost Corp., Salt Lake City, UT) for tabulated values predicted by the model (Eqs. 2, 3) at a confidence level of 0.95. Differences for both experimental data and model predictions were considered statistically significant for  $P < 0.05$ .

## 2.5. Chemicals

Collagenase type II (291 U/mg) was from Worthington (Freehold, NJ). All other chemicals and enzymes, including calpain inhibitor MDL was purchased from Sigma (St. Louis, MO).

## Results

### 3.1. Calpain inhibitor MDL makes $I_{NaL}$ decay faster in VCM from failing dog hearts

First we compare  $I_{NaL}$  decay in VCMs exposed to MDL with that in control, in the absence of the drug, at the intracellular  $Ca^{2+} = 1 \mu M$  (this intracellular  $Ca^{2+}$  was used in all experiments presented in this study). As it is shown in Fig. 1A in VCM exposed to MDL the  $I_{NaL}$  decay becomes faster than in control cell. Shown are raw traces along with the two-exponential fit (solid lines). Statistical data are given in Fig. 1B. Note that decay time course on the  $I_{NaL}$  became significantly faster in MDL-treated cells as it is obvious from the reduction of the time constants  $\tau_1$  (upper panel) and  $\tau_2$  (lower panel).

### 3.2. In VCMs from failing dog hearts calpain inhibitor MDL decreases $I_{NaL}$ density in wide range of the membrane potential without affecting the steady-state activation voltage-dependency

Treatment with MDL significantly reduced  $I_{NaL}$  density in VCMs compared with control and vehicle-treated cells (Fig. 2 A). The density was measured as an average current at the membrane potential of  $-30$  mV within 200–220 ms after the depolarization onset (shown by the vertical bar in Fig. 1A). Fig. 2B shows an effect of MDL on  $I_{NaL}$  density in the wide range of the membrane potentials assessed in the IV relationship (dots). The solid lines represent theoretical fit to the Eq.2 (see Methods) with the aim to assess SSA parameters (Shown in the graph). The MDL does not affect the voltage-dependence of the SSA as it is evident of the

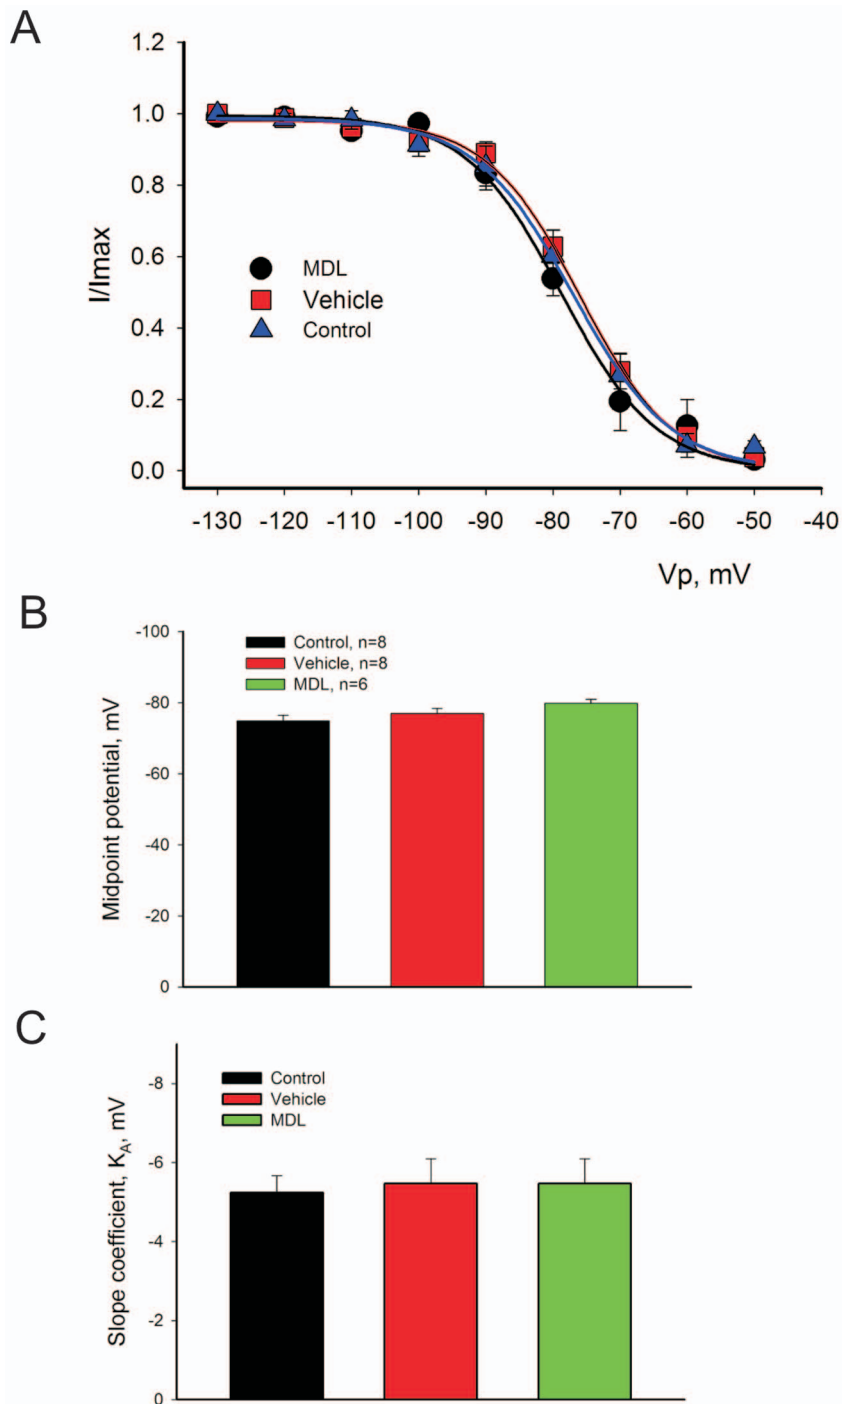

**Figure 3. Calpain inhibitor MDL does not affect the steady-state inactivation (SSI) parameters in cardiomyocytes from dogs with the chronic heart failure.** A. Data points and theoretical fit (solid lines, Eq. 3, Methods) for the steady-state inactivation in control (blue triangles, red squares), and in the presence of MDL (black circles). B, C- statistical analysis of SSI parameters; midpoint potential ( $V_{1/2}$ ), and slope ( $K_A$ ). There was no statistical difference between these groups. Data points were pooled from 8 cells. The intracellular  $[Ca^{2+}] = 1 \mu M$  in these experiments. doi:10.1371/journal.pone.0054436.g003

mid-potential position and the slope of the curve, which we found to be unchanged. At the same time MDL reduced the maximum conductance,  $G_{max}$ , for  $I_{NaL}$ , which is expected because of the density reduction (See Fig. 2 Legend).

### 3.3. In VCMs from failing dog hearts calpain inhibitor MDL decreases does not affect the SSI of $I_{NaL}$

Fig. 3A shows experimental points obtained by the two-pulse protocol along with the theoretical fit (solid lines, Eq.3 in Methods) for the SSI evaluation. There was no statistical difference (F-test) when the theoretical curves corresponding to a MDL, vehicle or control (no vehicle) were compared. Fig. 3B shows statistics for the

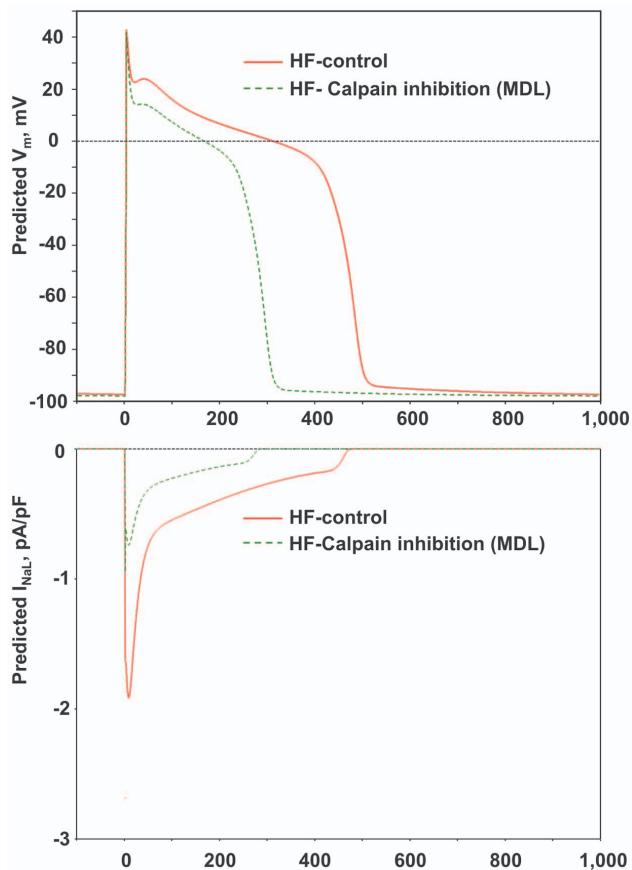

**Figure 4. Numerical model simulations of action potentials (upper panel) and  $I_{NaL}$  (lower panel) of a ventricular myocyte from dog with HF in control and in response to calpain inhibition by MDL.** All simulations are based on the respective changes of  $I_{NaL}$  parameters measured experimentally under voltage clamp (see Methods for the modeling details and Table 1). Pacing rate 1.0 Hz.  
doi:10.1371/journal.pone.0054436.g004

SSI parameters, mid-point potential and slope coefficient  $K_A$ . There was no significant difference for these parameters pointing to the absence of the effect on SSI by the MDL.

### 3.4. ECC model predictions of physiological importance

We tested if these experimentally measured  $I_{NaL}$  changes caused by the calpain inhibitor are physiologically significant in HF myocytes. Using  $I_{NaL}$  characteristics measured in the present study, we carefully calculated all  $I_{NaL}$  parameters (Table 1) required for numerical modeling of  $I_{NaL}$  effects as we previously established for VCMs of dog failing heart [17]. Specifically,  $I_{NaL,200ms}$  is the density of  $I_{NaL}$  measured at 200 ms after membrane depolarization onset;  $\tau_{BM}$  and  $\tau_{LSM}$  are  $\tau_1$  and  $\tau_2$ , respectively in Equation 1;  $k_{BM}$  and  $k_{LSM}$  are  $k_1$  and  $k_2$ , respectively in Equation 1; parameters  $k_G$ ,  $V_{1/2G}$ , and  $k_A$ ,  $V_{1/2A}$  are defined in Equations 2 and 3, respectively. We corrected  $I_{NaL}$  decay constants and maximum amplitude density for 37°C using  $Q_{10}$  factors (2.2 and 1.5, respectively) as we described in our previous studies [29,30] as follows:  $\tau_{37} = \tau_{24} \cdot 2.2^{(24-37)/10}$  and  $I_{max,37} = I_{max,24} \cdot 1.5^{(37-24)/10}$ . Finally,  $I_{max} = I_{max,BM} + I_{max,LSM}$  and  $G_{NaL,max}$  are the maximal total  $I_{NaL}$  peak current density and conductance, respectively. Fig. 4 upper panel shows results of the in silico test of how MDL-induced  $I_{NaL}$  changes affect AP shape

and duration at a physiological temperature of 37°C at a pacing rate of 1 Hz. Note that simulated APs are shorter with lower plateau in VCMs treated by MDL. Lower panel of Fig. 4 shows the prediction of  $I_{NaL}$  dynamics (profile) during the AP in control and after MDL treatment. Our simulations show that the amplitude and duration of  $I_{NaL}$  become substantially smaller in MDL-treated cells vs. control (untreated) cells. Fig. 5 upper panel shows in silico simulations of the intracellular  $[Ca^{2+}]_i$  dynamics in VCMs of failing heart. In response to the pulse train stimulation with the rate of 1.5 Hz, the diastolic  $Ca^{2+}$  level gradually increases in control conditions. The MDL-induced changes in  $I_{NaL}$  amplitude and decay kinetics almost completely eliminate this diastolic  $Ca^{2+}$  accumulation pattern. Lower panel of Fig. 5 shows simultaneous AP simulations for this condition. Note shorter AP with the lower plateau similarly to that shown in Fig. 4.

## Discussion

For the first time we demonstrate at the single cell level that  $I_{NaL}$  alterations in amplitude and decay kinetics associated with chronic HF can be rescued by calpain inhibition. Our in silico simulations also demonstrate that the calpain modulation of  $I_{NaL}$  is physiologically important in HF myocytes, specifically, calpain inhibition greatly improves the myocyte function by reducing the action potential duration, and intracellular diastolic  $Ca^{2+}$  accumulation in the pulse train.

The calpain family is a group of cysteine proteases unique in their dependency on calcium to attain functionally active forms [31]. Calpain is involved in a wide range of  $Ca^{2+}$ -regulated cellular processes such as signal transduction, secretion, cell proliferation, differentiation and apoptosis [11]. Calpain deregulation resulting from the impaired  $Ca^{2+}$  handling is one of the important mechanisms for the pathological processes such as apoptosis and necrosis, reperfusion-induced heart stunning, ischemia and hypoxia, hypertrophy and heart failure, and atrial fibrillation [11,32]. Therefore calpain inhibition is considered a therapeutic strategy targeting multiple disease states [32].

Our findings thus suggest a novel cellular and molecular mechanism to modulate NaCh that could be targeted to prevent pathophysiological consequences related to the augmented  $I_{NaL}$  in HF. There are some indications of the involvement of calpain into ion channel gating regulation, namely L-type  $Ca^{2+}$  channels [33,34]. In this context the calpain inhibition may serve to improve  $Ca^{2+}$  handling in failing heart and may be considered as a novel approach to modulate  $I_{NaL}$  current its related arrhythmias, and improve contractility [1,2]. Below we discuss possible cellular and molecular mechanisms of calpain effect on  $I_{NaL}$ .

### 4.1. Calpain and fodrin cytoskeleton

Fodrin-based cytoskeleton, an important element of the NaCh microenvironment in heart, is a dynamic structure that is altered under a variety of pathological conditions (e.g. ischemia or heart failure [13,14,35]). The role of the fodrin-based cytoskeleton in  $I_{NaL}$  modulation has been confirmed in our previous studies [1]. It has also been shown that fodrin breakdown that occurs in some disease states featuring poor  $Ca^{2+}$  handling can be mediated by calpain [15,35]. Therefore prevention of  $Ca^{2+}$ -induced fodrin cytoskeleton degradation will likely improve  $Ca^{2+}$  handling in HF.

### 4.2. Interplay between $Ca^{2+}$ , CAM/CaMKII cascade and calpain

It has been shown that  $I_{NaL}$  depends on the  $[Ca^{2+}]_i$  signaling cascade in the way that increased  $[Ca^{2+}]_i$  binds to EF-hand motif on NaCh C-terminal domain [6,36,37] or via activating CaM/

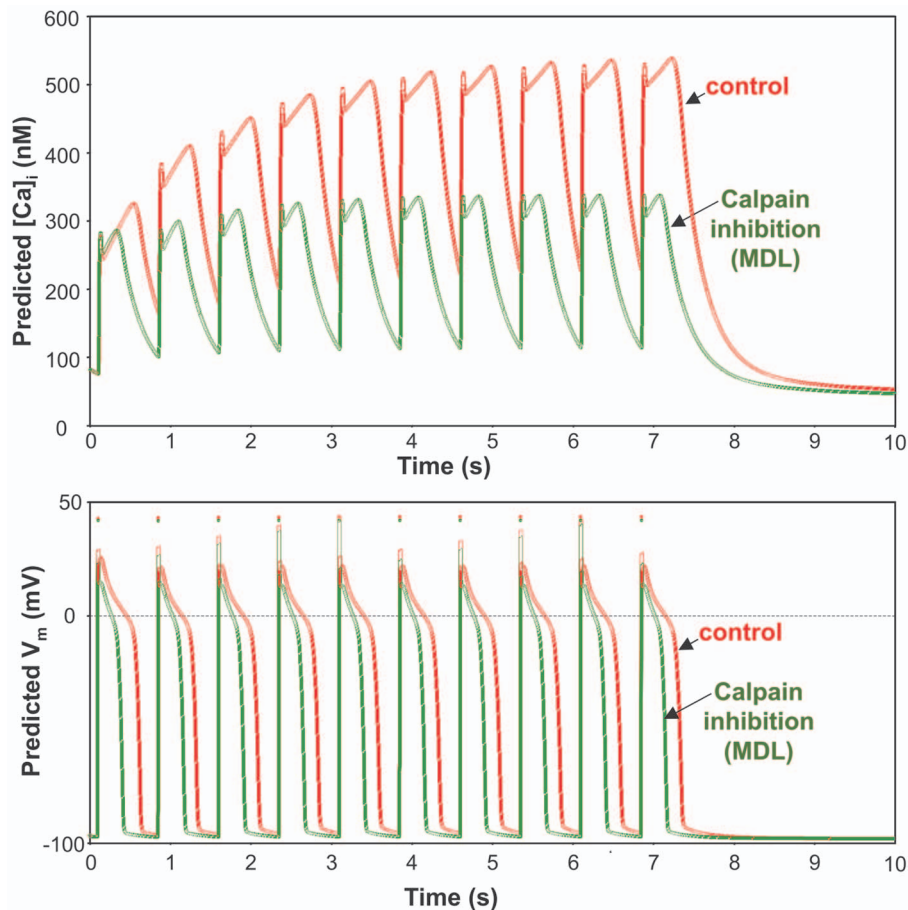

**Figure 5. An in silico demonstration of physiological consequences of the  $I_{NaL}$  amplitude reduction and decay acceleration in the presence of calpain inhibition in ventricular myocytes of dogs with HF.** Shown are model predictions for AP shape (lower panel) at 1 Hz pacing rate (steady-state) and cytosolic  $[Ca^{2+}]_i$  (upper panel) in a train of 10 consecutive excitation pulses applied with a rate of 1.5 Hz. Note a substantial diastolic  $[Ca^{2+}]_i$  accumulation at the end of the pulse train in control but not in the presence of MDL. At the same time AP duration significantly decreased by MDL during the pulse train (lower panel). doi:10.1371/journal.pone.0054436.g005

CaMKII cascade resulting in the augmented and slowed  $I_{NaL}$  [6,7]. This is very important mechanism of  $I_{NaL}$  regulation in HF because  $Ca^{2+}$  homeostasis is impaired in this disease stage. Inhibition of calpain results in reduced density of  $I_{NaL}$  despite of the presence of high  $[Ca^{2+}]_i$  that works in the opposite direction [6,7]. At the same time SSI and SSA parameters remain unchanged pointing to the fact that all channels are available for  $I_{NaL}$  and that the parameters of SSI and SSA depend on  $[Ca^{2+}]_i$ , rather than on calpain-dependent proteins. Indeed we have shown that the direct binding of  $Ca^{2+}$  to NaCh [37] (likely to E-F hand domain of NaCh C-terminus) is responsible for shifts of the half membrane potential of SSI voltage dependence towards depolarizing potentials [6]. Therefore, reduction of  $I_{NaL}$  density produced by MDL likely results from reduced probability of NaCh transitions into different modes (burst and late scattered modes) that are involved in  $I_{NaL}$  formation [29]. The faster  $I_{NaL}$  decay in the presence of calpain inhibition (Fig. 1) also indicates that gating of these modes is also affected by calpain.

#### 4.3. Interplay between calpain and NaCh $\beta$ -subunits

It has been shown that besides the main pore-forming  $\alpha$  subunit of NaCh [37], the  $\beta_2$ -subunit of NaCh is attached to the subsarcolemmal cytoskeleton [38]. Therefore prevention of cleavage of fodrin by calpain may stabilize the cytoskeleton and

enhance the  $\beta_2$ -subunit dependent modulation of  $I_{NaL}$  that we have recently reported [10]. We have shown that reduction of  $\beta_2$  expression by the siRNA increased  $I_{NaL}$  density and delayed its decay in VCMs from dogs with HF, i.e. very similar to that caused by the increased  $[Ca^{2+}]_i$  [6] (via activation of calpain) and opposite to that caused by the calpain inhibition by MDL shown herein.

#### 4.4. Physiological relevance of $Ca^{2+}$ -calpain signaling to modulate $I_{NaL}$ and to improve contractility and rhythm of failing heart

It has been established that  $I_{NaL}$  plays an important role in both electrical and contractile (via  $Ca^{2+}$  handling) deficiencies caused by chronic HF [1,2]. Then an important question is whether the magnitude of the effect of calpain inhibition on  $I_{NaL}$  reported in the present study is physiologically relevant. To address this question, we have carefully measured and analyzed specific characteristics of  $I_{NaL}$  in control and in the presence of MDL (Table 1) and then integrated them into our recently published ECC numerical model for ventricular cardiomyocytes of the failing dog [10,17]. As it is evident from Figs. 4 and 5, MDL substantially reduces effects of  $I_{NaL}$  on AP duration, which is known to increase in HF [1]. The resultant decrease of  $I_{NaL}$  during AP plateau is observed as  $I_{NaL}$  becomes scaled (decreased) by

about a factor of two during most of the plateau. This substantial “scaling” contributes not only to in AP duration shortening but also in to that AP plateau becomes substantially lower. This insight does not directly follow from the voltage clamp data and even not from AP simulations, because of a complex interplay of many  $Na^+$ - and  $Ca^{2+}$ - dependent mechanisms in ventricular cells reproduced by the dynamic ECC model.

Since shorter AP plateau and a smaller inward current during AP plateau are associated with less incidence of EADs [20,39], one expected beneficial effect of calpain inhibition is also to reduce the probability of the EADs [17], a major mechanism for the triggered arrhythmia. Recently we have demonstrated that the augmented and slowed  $I_{NaL}$  in HF contributes to the diastolic  $[Ca^{2+}]_i$  accumulation in VCM of failing hearts during the pulse train [17]. Reduction of  $I_{NaL}$  by the MDL significantly reduces this accumulation  $[Ca^{2+}]_i$  as it is predicted in silico (Fig. 5). Previously it has been demonstrated that delayed afterpotentials are linked to the diastolic  $Ca^{2+}$  accumulation associated with  $I_{NaL}$ , [17,40]. Therefore this predicted effect of MDL to prevent the diastolic  $[Ca^{2+}]_i$  accumulation indicates, in turn, that calpain inhibition can reduce probability of occurrence of the DADs.

## References

- Maltsev VA, Undrovinas A (2008) Late sodium current in failing heart: Friend or foe? *Progr Biophys Molec Biol* 96: 421–451.
- Noble D, Noble PJ (2006) Late sodium current in the pathophysiology of cardiovascular disease: consequences of sodium-calcium overload. *Heart* 92: iv1–iv5.
- Undrovinas AI, Belardinelli L, Undrovinas NA, Sabbah HN (2006) Ranolazine improves abnormal repolarization and contraction in left ventricular myocytes of dogs with heart failure by inhibiting late sodium current. *J Cardiovasc Electrophysiol* 17: S169–S177.
- Antzelevitch C, Belardinelli L, Zygmunt AC, Burashnikov A, Di Diego JM, et al. (2004) Electrophysiological effects of ranolazine, a novel antiarrhythmic agent with antiarrhythmic properties. *Circulation* 110: 904–910. Epub 2004 Aug 2009.
- Scirica BM, Morrow DA, Hod H, Murphy SA, Belardinelli L, et al. (2007) Effect of ranolazine, an antiarrhythmic agent with novel electrophysiological properties, on the incidence of arrhythmias in patients with non ST-segment elevation acute coronary syndrome: results from the Metabolic Efficiency With Ranolazine for Less Ischemia in Non ST-Elevation Acute Coronary Syndrome Thrombolysis in Myocardial Infarction 36 (MERLIN-TIMI 36) randomized controlled trial. *Circulation* 116: 1647–1652.
- Maltsev VA, Reznikov V, Undrovinas NA, Sabbah HN, Undrovinas A (2008) Modulation of the late sodium current by  $Ca^{2+}$ , calmodulin, and CaMKII in normal and failing dog cardiomyocytes: similarities and differences. *Am J Physiol Heart Circ Physiol* 294: H1597–H1608.
- Wagner S, Dybkova N, Rasenack EC, Jacobshagen C, Fabritz L, et al. (2006) Ca/calmodulin-dependent protein kinase II regulates cardiac Na channels. *J Clin Invest* 22: 22.
- Chauhan VS, Tuvia S, Buhusi M, Bennett V, Grant AO (2000) Abnormal cardiac  $Na^+$  channel properties and QT heart rate adaptation in neonatal ankyrin(B) knockout mice. *Circ Res* 86: 441–447.
- Mohler PJ, Schott JJ, Gramolini AO, Dilly KW, Guatimosim S, et al. (2003) Ankyrin-B mutation causes type 4 long-QT cardiac arrhythmia and sudden cardiac death. *Nature* 421: 634–639.
- Mishra S, Undrovinas NA, Maltsev VA, Reznikov V, Sabbah HN, et al. (2011) Post-transcriptional silencing of SCN1B and SCN2B genes modulates late sodium current in cardiac myocytes from normal dogs and dogs with chronic heart failure. *Am J Physiol Heart Circ Physiol* 301: H1596–1605.
- Bukowska A, Lendeckel U, Bode-Boger SM, Goette A (2010) Physiologic and Pathophysiologic Role of Calpain: Implications for the Occurrence of Atrial Fibrillation. *Cardiovasc Ther*: 1755–5922.
- Patterson C, Portbury AL, Schisler JC, Willis MS (2011) Tear me down: role of calpain in the development of cardiac ventricular hypertrophy. *Circ* 109: 453–462.
- Hein S, Kostin S, Heling A, Maeno Y, Schaper J (2000) The role of the cytoskeleton in heart failure. *Cardiovasc Res* 45: 273–278.
- Heling A, Zimmermann R, Kostin S, Maeno Y, Hein S, et al. (2000) Increased expression of cytoskeletal, linkage, and extracellular proteins in failing human myocardium. *Circ Res* 86: 846–853.
- Matsumura Y, Saeki E, Otsu K, Morita T, Takeda H, et al. (2001) Intracellular calcium level required for calpain activation in a single myocardial cell. *J Mol Cell Cardiol* 33: 1133–1142.
- Tsuji T, Ohga Y, Yoshikawa Y, Sakata S, Abe T, et al. (2001) Rat cardiac contractile dysfunction induced by  $Ca^{2+}$  overload: possible link to the proteolysis of alpha-fodrin. *Am J Physiol Heart Circ Physiol* 281: H1286–1294.
- Undrovinas NA, Maltsev VA, Belardinelli L, Sabbah HN, Undrovinas A (2010) Late sodium current contributes to diastolic cell  $Ca^{2+}$  accumulation in chronic heart failure. *J Physiol Sci* 60: 245.
- Sabbah HN, Goldberg AD, Schoels W, Kono T, Webb C, et al. (1992) Spontaneous and inducible ventricular arrhythmias in a canine model of chronic heart failure: relation to haemodynamics and sympathoadrenergic activation. *Eur Heart J* 13: 1562–1572.
- Sabbah HN, Stein PD, Kono T, Gheorghide M, Levine TB, et al. (1991) A canine model of chronic heart failure produced by multiple sequential coronary microembolizations. *Am J Physiol* 260: H1379–1384.
- Maltsev VA, Sabbah HN, Higgins RSD, Silverman N, Lesch M, et al. (1998) Novel, ultraslow inactivating sodium current in human ventricular cardiomyocytes. *Circulation* 98: 2545–2552.
- Urthaler F, Wolkowicz PE, Digerness SB, Harris KD, Walker AA (1997) MDL-28170, a membrane-permeant calpain inhibitor, attenuates stunning and PKC epsilon proteolysis in reperfused ferret hearts. *Cardiovasc Res* 35: 60–67.
- Kameyama M, Hofmann F, Trautwein W (1985) On the mechanism of beta-adrenergic regulation of the Ca channel in the guinea-pig heart. *Pflügers Arch* 405: 285–293.
- Mathias RT, Cohen IS, Oliva C (1990) Limitations of the whole cell patch clamp technique in the control of intracellular concentrations. *Biophys J* 58: 759–770.
- Oliva C, Cohen IS, Mathias RT (1988) Calculation of time constants for intracellular diffusion in whole cell patch clamp configuration. *Biophys J* 54: 791–799.
- Pusch M, Neher E (1988) Rates of diffusional exchange between small cells and a measuring patch pipette. *Pflügers Arch* 411: 204–211.
- Undrovinas A, Maltsev VA (2008) Late sodium current is a new therapeutic target to improve contractility and rhythm in failing heart. *Cardiovasc Hematol Agents Med Chem* 6: 348–359.
- Maltsev VA, Sabbah HN, Undrovinas AI (2002) Down-regulation of sodium current in chronic heart failure: effects of long-term therapy with carvedilol. *Cell Mol Life Sci* 59: 1561–1568.
- Winslow RL, Rice J, Jafri S, Marban E, O'Rourke B (1999) Mechanisms of altered excitation-contraction coupling in canine tachycardia-induced heart failure, II: model studies. *Circ Res* 84: 571–586.
- Maltsev VA, Undrovinas AI (2006) A multi-modal composition of the late  $Na^+$  current in human ventricular cardiomyocytes. *Cardiovasc Res* 69: 116–127.
- Maltsev VA, Silverman N, Sabbah HN, Undrovinas AI (2007) Chronic heart failure slows late sodium current in human and canine ventricular myocytes: Implications for repolarization variability. *Eur J Heart Fail* 9: 219–227.
- Hanna RA, Campbell RL, Davies PL (2008) Calcium-bound structure of calpain and its mechanism of inhibition by calpastatin. *Nature* 456: 409–412.
- Carragher NO (2006) Calpain inhibition: a therapeutic strategy targeting multiple disease states. *Curr Pharm Des* 12: 615–638.
- Belles B, Malecot CO, Hescheler J, Trautwein W (1988) “Run-down” of the Ca current during long whole-cell recordings in guinea pig heart cells: role of phosphorylation and intracellular calcium. *Pflügers Arch* 411: 353–360.
- Belles B, Hescheler J, Trautwein W, Blomgren K, Karlsson JO (1988) A possible physiological role of the Ca-dependent protease calpain and its inhibitor calpastatin on the Ca current in guinea pig myocytes. *Pflügers Arch* 412: 554–556.

## 4.5. Conclusion

Based on our present results with the specific calpain inhibitor MDL in ventricular cardiomyocytes isolated from failing dog hearts, we conclude that  $Ca^{2+}$ -dependent calpain activation is able to strongly modulate  $I_{NaL}$  density and kinetics in failing myocardium. We illustrate in silico that the range of this modulation is physiologically relevant and remarkable as the calpain inhibition substantially improves (shortens) AP duration and prevents diastolic  $Ca^{2+}$  accumulation. Therefore, this  $Ca^{2+}$ -dependent signaling cascade may serve as a plausible target to regulate  $I_{NaL}$  and its related electrical and contractile deficiencies in failing heart.

## Author Contributions

Conceived and designed the experiments: AU. Performed the experiments: AU. Analyzed the data: AU VM. Contributed reagents/materials/analysis tools: HNS. Wrote the paper: AU VM HNS.



35. Yoshida K, Inui M, Harada K, Saido TC, Sorimachi Y, et al. (1995) Reperfusion of rat heart after brief ischemia induces proteolysis of caldesmon (nonerythroid spectrin or fodrin) by calpain. *Circ Res* 77: 603–610.
36. Wingo TL, Shah VN, Anderson ME, Lybrand TP, Chazin WJ, et al. (2004) An EF-hand in the sodium channel couples intracellular calcium to cardiac excitability. *Nat Struct Mol Biol* 11: 219–225.
37. Abriel H, Kass RS (2005) Regulation of the voltage-gated cardiac sodium channel Nav1.5 by interacting proteins. *Trends Cardiovasc Med* 15: 35–40.
38. Malhotra JD, Kazen-Gillespie K, Hortsch M, Isom LL (2000) Sodium channel  $\beta$  subunits mediate homophilic cell adhesion and recruit ankyrin to points of cell-cell contact. *J Biol Chem* 275: 11383–11388.
39. January CT, Moscucci A (1992) Cellular mechanisms of early afterdepolarizations. *Annals of the New York Academy of Sciences* 644: 23–32.
40. Sossalla S, Wagner S, Rasenack EC, Ruff H, Weber SL, et al. (2008) Ranolazine improves diastolic dysfunction in isolated myocardium from failing human hearts – Role of late sodium current and intracellular ion accumulation. *J Mol Cell Cardiol* 14: 14.
